# Supplementary material for: Cytotoxicity of Ficus Crocata Extract on Cervical Cancer Cells and Protective Effect against Hydrogen Peroxide-Induced Oxidative Stress in HaCaT Non-Tumor Cells
Source: MDPI journal article supplement (doi:10.3390/plants10010183), 2021-01-19
Supplement: s1 [file s1]

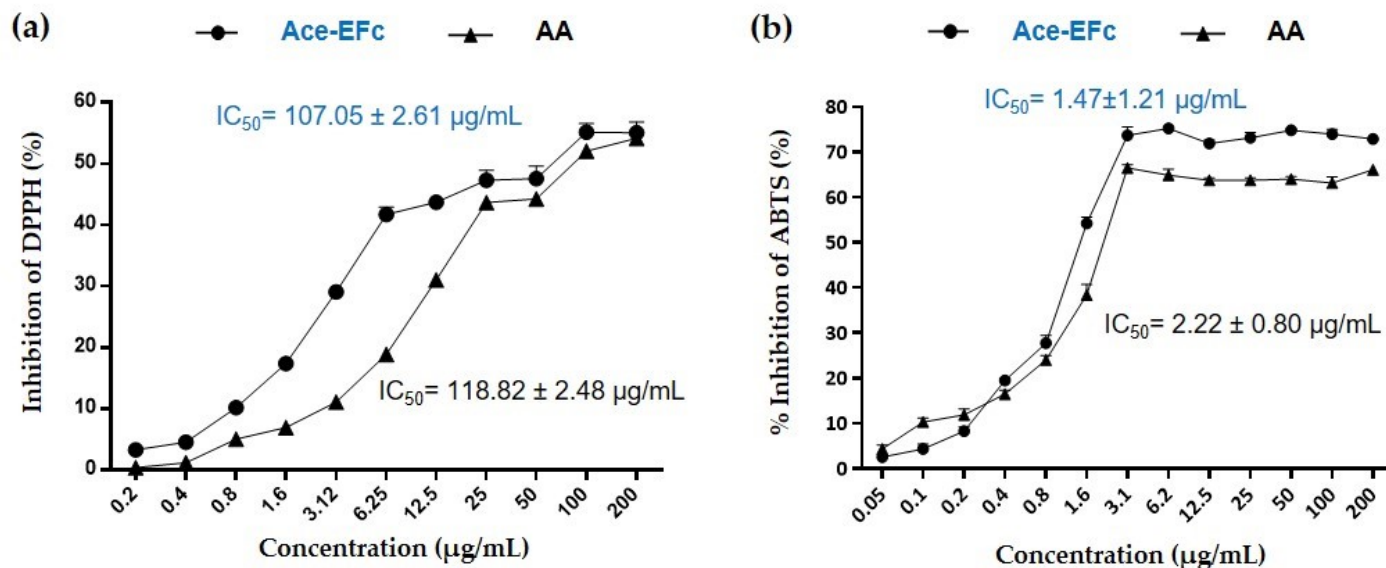

**Supplementary figure 2. Antiradical activity of Ace-EFc.** (a) DPPH and (b) ABTS free radical scavenging activity of acetone extract of the leaf of *F. crocata* (Ace-EFc). AA: ascorbic acid, was used as standard.  $IC_{50}$  of Ace-EFc on DPPH =  $107.05 \pm 2.61 \mu\text{g/mL}$ ,  $IC_{50}$  of AA on DPPH =  $118 \pm 2.48 \mu\text{g/mL}$  ( $p > 0.05$ ).  $IC_{50}$  of Ace-EFc on ABTS =  $1.47 \pm 1.21 \mu\text{g/mL}$ ,  $IC_{50}$  of AA on ABTS =  $2.22 \pm 0.80 \mu\text{g/mL}$  ( $p < 0.05$ ). t student test.
