# Supplementary material for: Cytotoxicity of Ficus Crocata Extract on Cervical Cancer Cells and Protective Effect against Hydrogen Peroxide-Induced Oxidative Stress in HaCaT Non-Tumor Cells
Source: MDPI journal article supplement (doi:10.3390/plants10010183), 2021-01-19
Supplement: s1 [file s1]

(a)

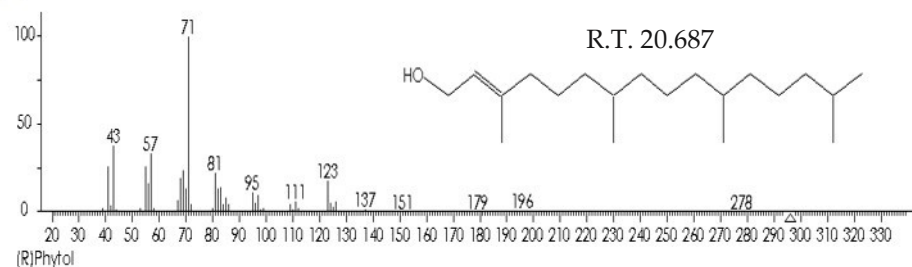

(b)

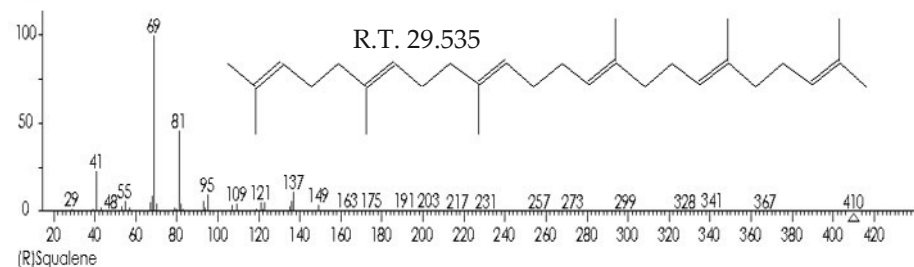

(c)

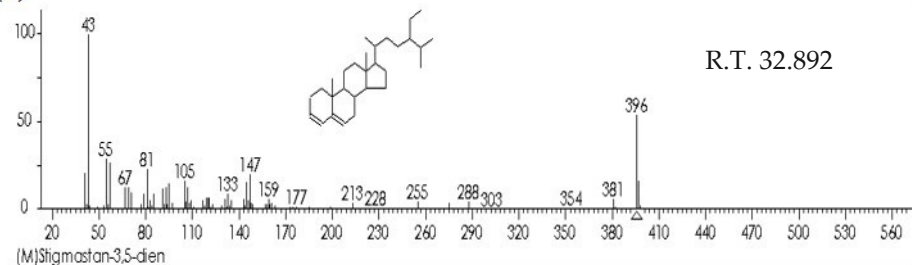

(d)

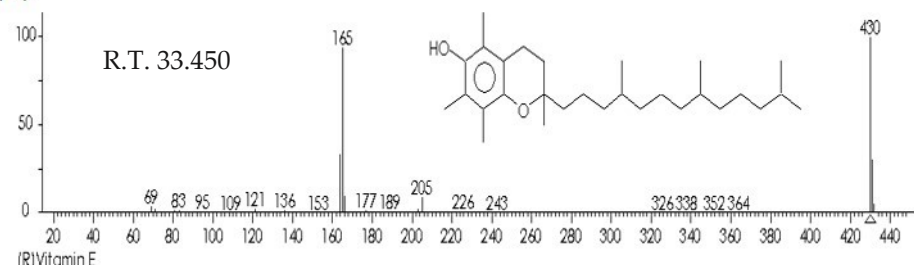

(e)

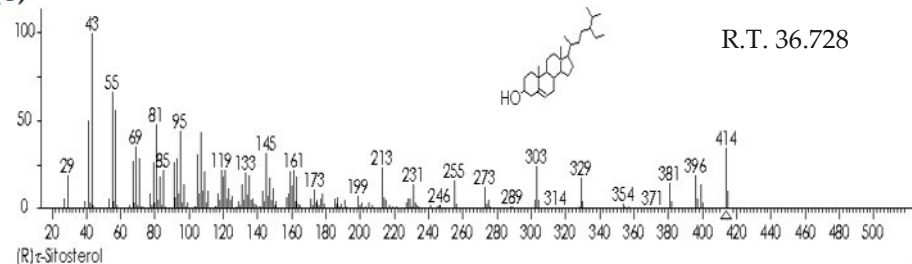

(f)

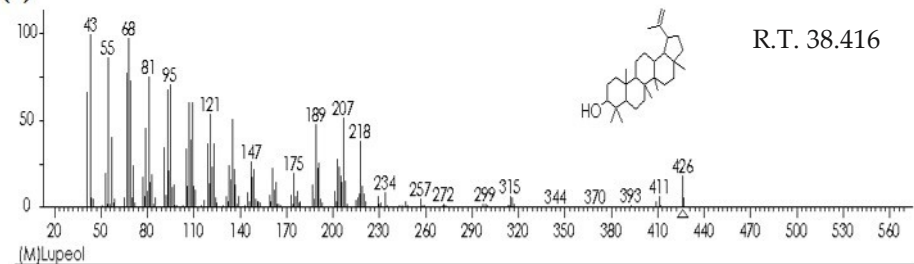

**Supplementary figure 1. GC-MS analysis of acetone extract of *Ficus crocata* (Miq.) Mart. ex Miq. leaves.** Chromatogram and structure of the compounds identified in Ace-EFc. (a) Phytol; (b) squalene; (c) Stigmasteran-3,5-dien; (d) alpha-tocopherol; (e) β-sitosterol; (f) lupeol. R.T: retention time.
